# Supplementary material for: An Eu3+ post-functionalized nanosized metal–organic framework for cation exchange-based Fe3+-sensing in an aqueous environment
Source: Royal Society of Chemistry journal article supplement (doi:10.1039/c4ta01297f), 2014-01-01
Supplement: c4ta01297f1.pdf [file c4ta01297f1.pdf]

## Supporting information

### **Eu<sup>3+</sup> post-functionalized nanosized metal-organic framework for cation exchange-based Fe<sup>3+</sup>-sensing in aqueous environment**

You Zhou<sup>a</sup>, Hao-Hong Chen<sup>b</sup>, Bing Yan<sup>\*,a</sup>

<sup>a</sup> Department of Chemistry, Tongji University, Siping Road 1239, Shanghai 200092,  
China

<sup>b</sup> Shanghai Institute of Ceramics, Chinese Academy of Sciences, Shanghai  
200050, China

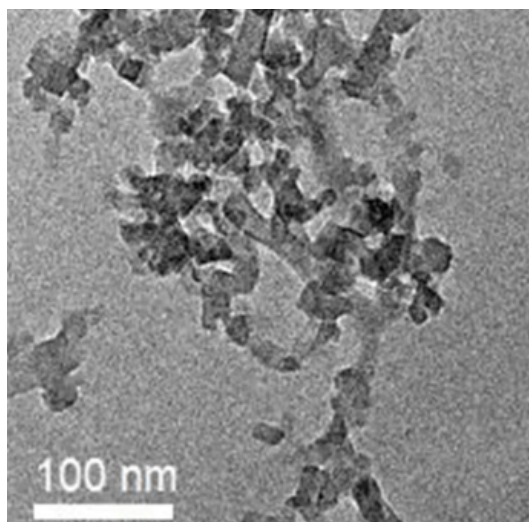

**Figure S1.** TEM image of nanocrystals of **1**

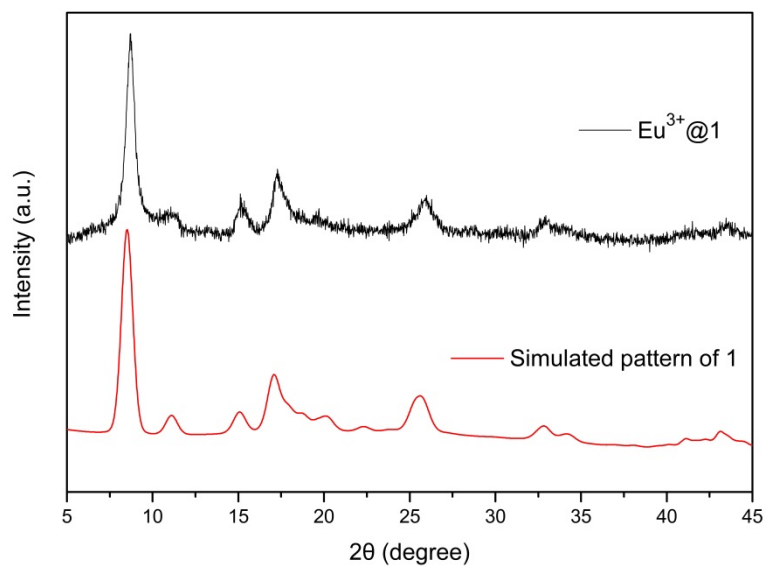

**Figure S2.** PXRD pattern of Eu<sup>3+</sup>@1 nanocrystals.

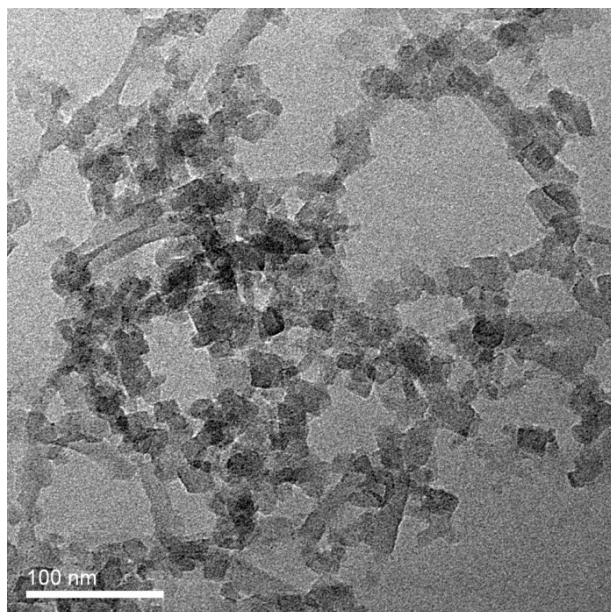

**Figure S3.** TEM image of  $\text{Eu}^{3+}@1$  nanocrystals.

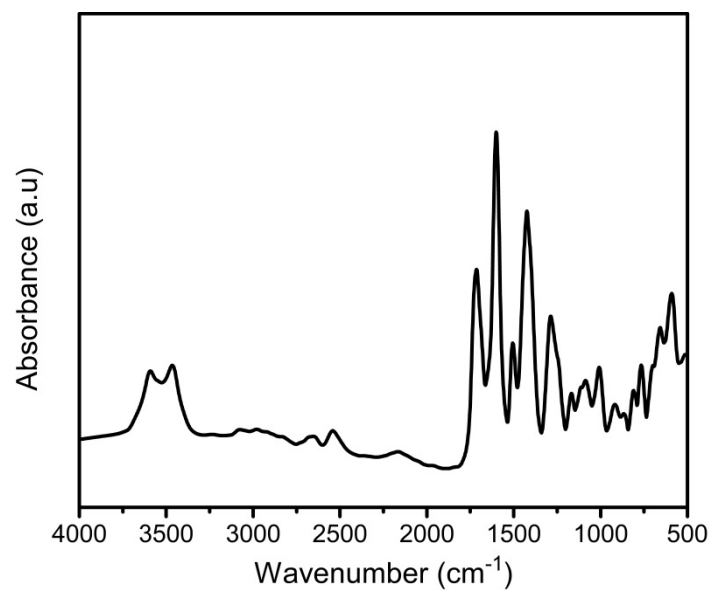

**Figure S4.** FTIR spectra of nanocrystals of Eu<sup>3+</sup>@1.

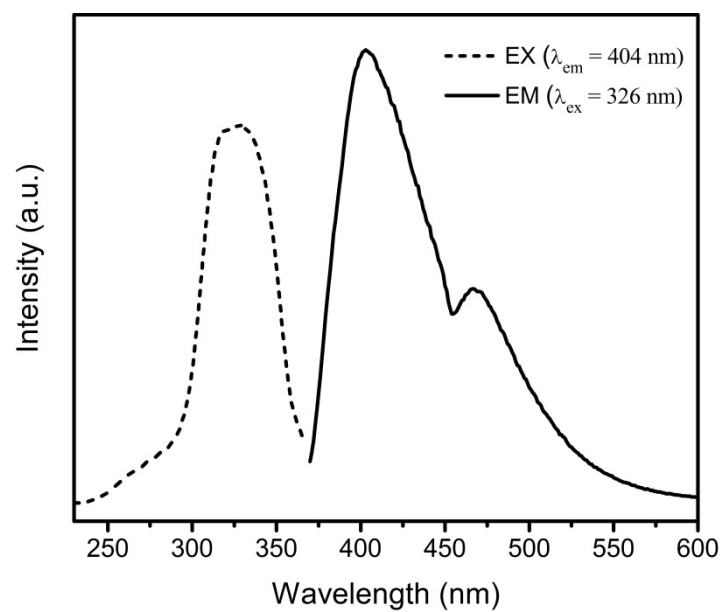

**Figure S5.** The excitation and emission spectra of compound **1**.

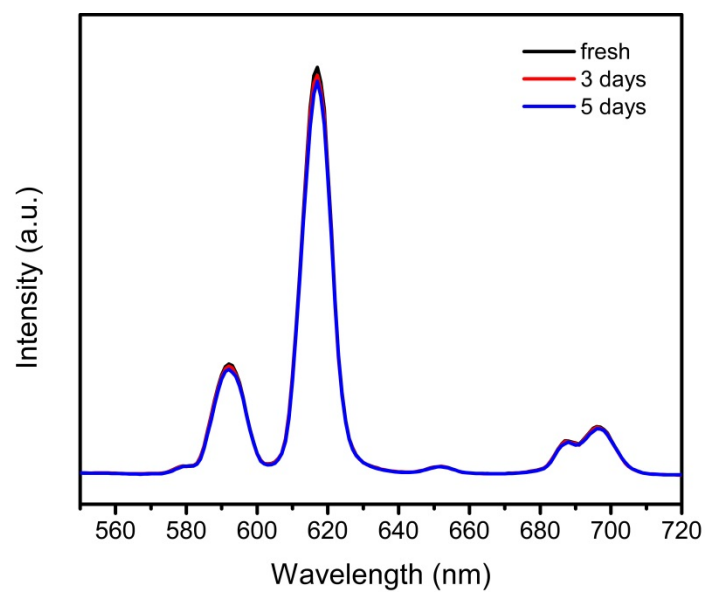

**Figure S6.** Day-to day fluorescence stability of Eu<sup>3+</sup>@1 in aqueous solution.

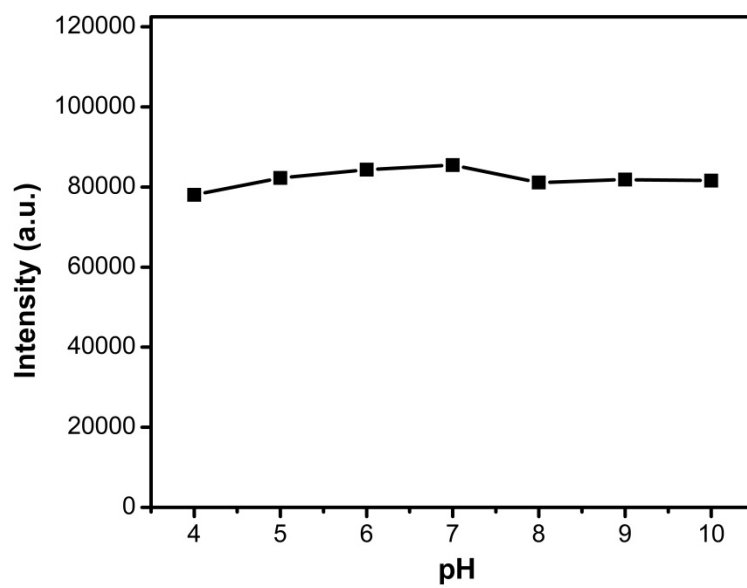

**Figure S7.** Effect of pH (aqueous solution) on the fluorescence intensity of  $\text{Eu}^{3+}@1$ .



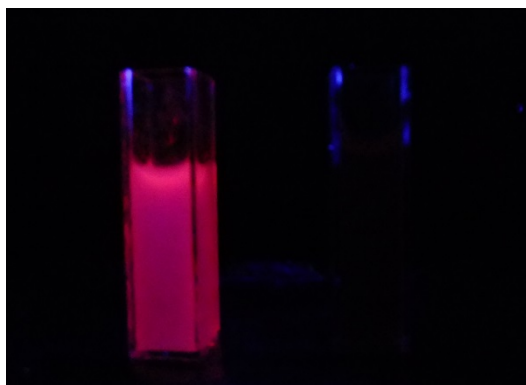

**Figure S8.** Photographs of aqueous solutions of Eu<sup>3+</sup>@1 in the presence and absence of Fe<sup>3+</sup> (0.4 g L<sup>-1</sup>).

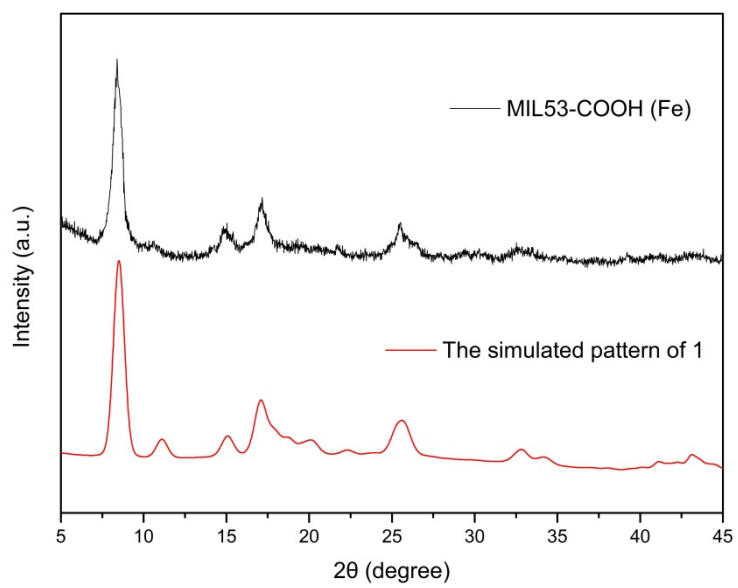

**Figure S9.** PXRD pattern of MIL-53-COOH (Fe).

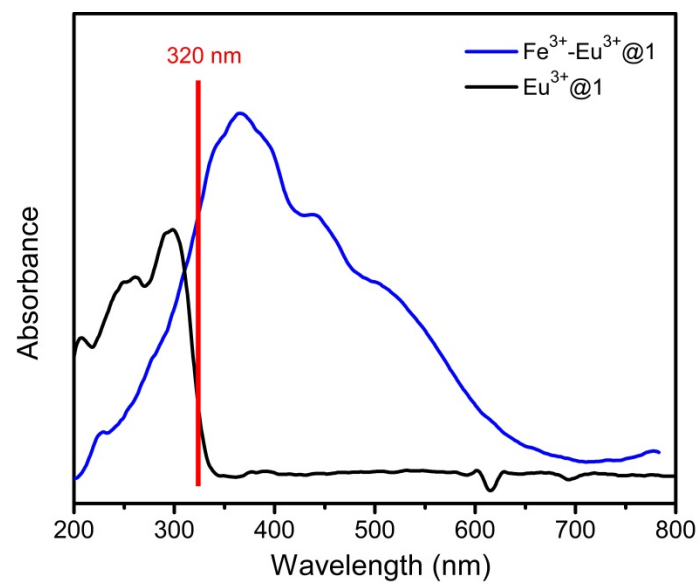

**Figure S10.** The DR UV-vis spectra of  $\text{Eu}^{3+}@1$  and  $\text{Fe}^{3+}\text{-Eu}^{3+}@1$ .

**Table R1.** Lattice parameter of MIL-53-COOH (Al)

| Sample           | Space group | $a/\text{\AA}$ | $b/\text{\AA}$ | $c/\text{\AA}$ | $\beta/^\circ$ |
|------------------|-------------|----------------|----------------|----------------|----------------|
| MIL-53-COOH (Al) | imma        | 6.5469         | 15.965         | 13.517         | 90             |
